28 <sup>10</sup>CIBIO-InBIO, Research Center in Biodiversity and Genetic Resources, University  
29 of Porto, 4485-661 Vairão, Portugal

30 <sup>11</sup>Departamento de Ecologia, Universidade Federal de Goiás, Campus  
31 Samambaia, Goiânia - GO, Brazil

32 <sup>12</sup>Centre for Ecology, Evolution and Environmental Changes (cE3c), University of  
33 Lisboa, Lisbon, Portugal

34 <sup>13</sup>Ecological Networks, Department of Biology, TU Darmstadt, 64287 Darmstadt,  
35 Germany

36 <sup>14</sup>Conservation Ecology, Department of Biology, Philipps-Universität Marburg, Karl-  
37 von-Frisch-Str. 8, 35043 Marburg, Germany

38 <sup>15</sup>Zoological Institute of the Russian Academy of Sciences, 199034, Saint  
39 Petersburg, Russia

40 \*Correspondence to: Sergio Timóteo; Email: [sergio.timoteo@uc.pt](mailto:sergio.timoteo@uc.pt)

41

42 **Abstract:** The importance of keystone species is often defined based on a single  
43 type of interaction (e.g., keystone predator). However, it remains unclear whether  
44 this functional importance extends across interaction types. We conducted a global  
45 meta-analysis of interaction networks to examine whether species functional  
46 importance in one niche dimension is mirrored in other niche dimensions, and  
47 whether this is associated with interaction outcome (mutualistic/antagonistic) or  
48 intimacy (temporary/permanent). We show that the importance of keystone species  
49 is positively correlated across multiple dimensions of species' ecological niche,  
50 independently from species' abundance, interaction outcome or intimacy. This  
51 suggests that keystone multidimensionality is a widespread phenomenon and  
52 can be used to identify keystone species across several interaction types, playing a  
53 central role in determining ecosystem resilience and defining conservation  
54 strategies.

55

56 **One sentence summary:** Importance of keystone species is positively associated  
57 across ecological niche dimensions regardless of species' abundance.

58 **Main text:** Keystone species are essential for ecosystem functioning and stability  
59 (1, 2), and are thus a popular concept in ecological research and conservation  
60 practitioners, even if often identified based on slightly different criteria (reviewed in  
61 3). A frequently used definition characterizes keystone species as those species  
62 whose proportional importance for a given ecological process (e.g., herbivory,  
63 parasitism, pollination, or seed dispersal) greatly surpasses that of other more  
64 abundant species in the community (2). Due to the intrinsic difficulty of quantifying  
65 species contributions to ecological functions at the community level, most research  
66 on the role of keystone species has focused on a single ecological function, such  
67 as predation in food web studies (e.g. 1). However, all species establish different  
68 types of interactions with other species in their surroundings (4, 5), thus playing  
69 multiple ecological roles that together define their multidimensional niche (6, 7). For  
70 example, many birds include insects and seeds in their diets, thus acting  
71 simultaneously as antagonists, when preying upon insects or destroying the  
72 ingested seeds, and mutualists, if seeds escape digestion and are dispersed away  
73 from the parental plant (8). If insects and seeds are not available, some of these  
74 birds might opportunistically consume nectar, eventually acting as pollinators (9).  
75 Furthermore, most of these birds will be preyed upon by carnivores or consumed  
76 by scavengers (10). Such a myriad of ecological functions raises the question of  
77 whether keystone species are simultaneously important for their multiple niche  
78 dimensions or, alternatively, if they tend to be particularly so for a single function or  
79 dimension.

80 In order answer this question, we first need to quantify species roles across  
81 multiple niche dimensions under the same theoretical framework, a task that poses  
82 a significant challenge (11). While food webs have been studied for a long time (1),  
83 recent increases in availability of high quality empirical datasets and advances in  
84 ecological network theory have increased our ability to make sense of the intrinsic  
85 complexity of biological communities (12). By simultaneously considering species  
86 (nodes) and the interactions (links) that bind them together into functional  
87 communities, ecological network analysis has offered a valuable tool to explore the  
88 emergent patterns generated by the biotic interactions that define a species'

89 ecological niche (13). Nevertheless, the study of ecological networks with species-  
90 level resolution is still dominated by bipartite networks, where species of two  
91 groups are linked by a single type of interaction, such as pollination (14), seed  
92 dispersal (15), or parasitism (16). Only more recently, some studies have started to  
93 explore the relationship between two types of species interactions within a network  
94 framework (17–20). For instance, recent research suggests a positive correlation  
95 between the importance of mammals as seed dispersers and seed predators (17)  
96 and also between birds acting as seed dispersers and pollinators (18), but no  
97 association in the importance of frugivorous and nectarivorous bats (19) or  
98 between plant mycorrhizal fungi and frugivores (20). However, none of these  
99 pairwise comparisons accounted for the effect of species abundance as a key  
100 driver of species importance.

101 We now know that both species richness and abundance have positive and  
102 independent effects on ecosystem multifunctionality (21, 22), with more abundant  
103 species being more important contributors to community functioning (23). The  
104 effect of abundance may result from neutral processes, with all individuals having  
105 an equivalent functional contribution regardless of species identity (24). In turn,  
106 species importance is the combined result of two components: species' local  
107 abundance or densities, which drives the underlying encounter probability between  
108 species – the “mass action hypothesis”, and species' interaction preferences, as  
109 determined by morphological, physiological and ecological traits (25).  
110 Disentangling these two components is thus essential to correctly identify the role  
111 of “keystone species” in their communities.

112 Here, we explored whether species' functional importance, in terms of their impact  
113 on other co-occurring species, i.e., keystone species status, is maintained across  
114 different interaction types. To this end, we assembled a global dataset of 18  
115 quantitative tripartite networks, each composed by two bipartite subnetworks  
116 coupled by a shared set of species at the interface of the paired networks (Fig. 1A).  
117 Overall, these networks encompass six distinct interaction types: herbivory,  
118 parasitism, seed dispersal, pollination, commensalism, and mycorrhizas (Table

119 S1). Each tripartite species interaction network had on average 162 species (min.  
120 = 25; max. = 690) and 367 links (min. = 56; max. = 1414). These networks had an  
121 average of 58 species at the intermediate level (min. = 9; max. = 359), of which, on  
122 average, 23 species (min. = 7; max. = 155) participated in both bipartite  
123 subnetworks, thus forming the interface between them (Table S1).  
124 Based on this dataset, we performed a meta-analysis (26) testing what extent a  
125 species' functional importance in one niche dimension is correlated with its  
126 importance in a second niche dimension (represented by the interactions in the two  
127 bipartite subnetworks, Fig. 1B-D). We then explored whether the any relationships  
128 found were driven by (1) the relative abundance of the species, (2) the outcome of  
129 the interaction (mutualistic vs antagonistic), or (3) the intimacy of the interaction  
130 (temporary vs permanent). We independently quantified species importance for  
131 each niche dimension by estimating species strength, a species-level network  
132 descriptor expressing to what extent a trophic level depends on each species from  
133 another level, calculated as the cumulative sum of species dependencies (26, 27).  
134 This allowed us to test, for example, if the functional importance of each plant  
135 species for the entire pool of pollinators is correlated with its importance for the  
136 entire pool of herbivores in an herbivore-plant-pollinator tripartite network (Fig. 1).

137

## 138 **Results**

139 For those species at the interface of each tripartite network, we calculated the  
140 Pearson's correlation coefficient between the (log-transformed) species strength  
141 for the two subnetworks (26). We found a positive and statistically significant  
142 overall correlation of species strength between paired subnetworks (mean  
143 Pearson's  $r = 0.42$ ,  $z = 3.33$ ,  $p < 0.001$ ; Fig. 2, Table 1, and Table S2 for  
144 correlations for each individual network). To understand if this correlation was  
145 affected by species relative abundance, we needed to remove its effect from the  
146 interaction strengths. To this end, we standardized all matrices according to the  
147 "mass action hypothesis", which assumes that the encounter probability between  
148 species is mainly driven by the product of their local abundances, and any  
149 deviation from this is the result of species preferences (25, 26). We thus obtained

150 “interaction preference matrices”. As above, for each of the standardized matrices  
151 we obtained a (log-transformed) standardized species strength and calculated  
152 again Pearson’s correlation coefficients. Accounting for species abundances  
153 reduced the correlation of species strength between paired subnetworks in 16 of  
154 the 18 studies (paired t-test:  $t = 3.31$ ,  $df = 17$ ,  $p = 0.004$ ; mean difference = 0.11).  
155 However, even after accounting for species abundances the overall correlation of  
156 standardized species strength between paired subnetworks was weaker but  
157 remained positive, and statistically significant, across studies (mean Pearson’s  $r =$   
158 0.24,  $z = 2.41$ ,  $p = 0.016$ ; Fig. 2, Table 1, and Table S2 for correlations for each  
159 individual network).

160 Heterogeneity in correlation coefficients among studies was larger than expected  
161 by chance (species strength:  $QE = 72.403$ ,  $df = 17$ ,  $p < 0.001$ ; standardized  
162 species strength:  $QE = 39.524$ ,  $df = 17$ ,  $p = 0.002$ , Table 1), and accounted for a  
163 relatively high proportion of the total variability among studies (species strength:  $R^2$   
164 = 80.2%; standardized species strength:  $R^2 = 63.3\%$ , Table 1).

165 To explore the potential sources of such heterogeneity, we classified each  
166 subnetwork according to their interaction outcome (antagonistic vs. mutualistic)  
167 and intimacy (permanent vs. temporary) (26). These subgroup analyses indicated  
168 that the mean correlations of unstandardized and standardized species strength  
169 were consistent among subgroups, even if uncertainty was larger for those  
170 combinations of interaction outcome and intimacy that were represented by fewer  
171 networks, and despite being more evident for networks with antagonist or  
172 permanent interactions (Fig. 2 and Table 1). Accordingly, including interaction  
173 outcome and intimacy as moderators (i.e., explanatory variables) in the model,  
174 accounted for virtually no heterogeneity in the correlations of unstandardized  
175 species strength (Table 1 and Table S3).

176

## 177 **Discussion**

178 Natural communities are bound together by multiple types of biotic interactions.  
179 Understanding how species and biotic interactions couple ecological processes

180 across multiple functional levels is critical to advance our understanding of  
181 ecosystem structure and functioning (28), and for predicting the effects of global  
182 change on ecosystem resilience (29). Our meta-analysis of tripartite networks  
183 revealed that, overall, species' importance – in terms of their functional effects on  
184 other species – is positively associated across multiple ecological niche  
185 dimensions, irrespective of species abundance (Fig. 2, Table 1, and Table S3).  
186 This means that species that interact strongly with many other species in one  
187 dimension of their niche also tend to be the most connected in other niche  
188 dimensions. As a result, species that have a disproportionate importance for a  
189 particular ecosystem function (i.e., keystone species) also tend to be important for  
190 other functions in the communities they integrate. This seems to be a general  
191 pattern as we found no evidence that the strength of this positive association  
192 depends on whether the interaction is antagonistic or mutualistic and on whether it  
193 is temporary (e.g., pollination or seed dispersal) or permanent (e.g., plant-fungal  
194 interactions).

195 It is well established that abundance is an important driver of a species' overall  
196 effect on ecosystem functioning (21, 22). Under the assumptions of the neutral  
197 theory of biodiversity (24), we would expect no significant correlation in species  
198 importance across multiple dimensions of their niche, beyond that explained by  
199 species relative abundances. By calculating species strength based on interaction  
200 preference matrices, we were able to isolate the effect that abundance has on  
201 interaction frequencies. We showed that species abundance indeed contributes to  
202 the correlation in species strength across different niche dimensions, as these  
203 correlations consistently became weaker after we removed the effect of species  
204 abundance. However, we still found a significant positive signal of species  
205 functional importance across multiple interaction networks (Fig. 2, Table 1, Table  
206 S2 and Table S3). This indicates that species preferences, related to trait-  
207 matching, physiological needs, or seasonal changes to partners species strongly  
208 contribute to the functional importance of species across the range of biotic  
209 interactions that characterize their ecological niche.



210 A likely mechanism underlying species' keystone across multiple ecological  
211 functions is the existence of important traits that modulate species' interactions  
212 patterns across different functional groups. For instance, previous work has shown  
213 that visual or olfactory flower traits can attract both pollinators and herbivores (30),  
214 and that herbivore-induced plant defence mechanisms can affect interactions with  
215 pollinators (31). In addition, selection from both pollinators and herbivores can  
216 result in the correlated evolution of plant traits related to these interactions (e.g.,  
217 flower morphology and self-incompatibility; 34). Body size is another such trait that  
218 might play a key role in interaction probabilities in certain networks. For example,  
219 small birds are disproportionately important for linking pollination and seed  
220 dispersal networks (33). Because similar mechanisms might shape other types of  
221 interactions, identifying traits or trait syndromes that regulate species interactions  
222 in multiple niche dimensions could be key to understand the structure of  
223 multidimensional interaction networks.

224 Notably, this signal appears to be consistently preserved across antagonistic and  
225 mutualistic as well as temporary and permanent interactions (Fig. 2 and Table S2).  
226 This suggests that irrespective of these interaction characteristics, keystone  
227 species have a strong impact on other species in more than one dimension of their  
228 functional niche. The fact that in the subgroup analyses, this signal was most  
229 obvious in networks containing antagonistic and permanent interactions, and less  
230 so in networks with mutualistic and temporary interactions, may be explained by  
231 the relatively low sample sizes in the latter groups (Fig. 2 and Table 1).

232 The identification of keystone species for ecosystem functioning has long been a  
233 central topic in ecology and conservation (4, 34). Our study provides evidence that  
234 the importance of these species is not restricted to single niche dimensions but  
235 extends across multiple dimensions of their functional niche (35). Our findings also  
236 imply that this multidimensionality of keystone species is a general phenomenon  
237 that can couple distinct ecological functions. Accordingly, the loss of keystone  
238 species likely intensifies trophic cascades and rapid community collapse (5, 36). In  
239 this regard our study also implies that the benefits of protecting keystone species

240 are not restricted to single ecosystem functions but are likely to extend across  
241 multiple ecosystem functions (37). This shows that biotic interactions are not only  
242 critical to understand specific ecosystem functions, such as predation, disease  
243 transmission, or pollination, but also that the dimensionality of species interactions  
244 is vital for structuring entire ecosystems and probably determines their sensitivity to  
245 perturbations or species extinctions (38).

246 It is important to realize that bipartite networks (those focusing on a single  
247 interaction type) represent an abstraction imposed by sampling constraints.  
248 However, there are still relatively few studies simultaneously quantifying multiple  
249 interaction types at the same site (17, 20). Therefore, it is now increasingly clear  
250 that only by jointly considering the multiple dimensions that characterize species  
251 interaction networks can we get closer to understanding the intrinsic complexity of  
252 real ecosystems (6, 7, 28). However, given the novelty and the number of  
253 interaction networks sampled, the present results can be taken as a starting point  
254 to delve into the interplay between abundance, interaction type, species traits and  
255 (co-) evolutionary history as promising avenues for future research. We show that  
256 keystone species tend to be disproportionately important across multiple niche  
257 dimensions, regardless of their abundance, interaction outcome or intimacy. It must  
258 also be considered that to relate structure and function in interaction networks we  
259 need much more information on the contribution of each species to the different  
260 functions. We advocate that more comprehensive datasets that integrate all these  
261 aspects are required for a deeper understanding of how species interactions shape  
262 ecosystem structure and function.

263

## 264 **References and Notes**

- 265 1. R. T. Paine, A note on trophic complexity and community stability. *Am. Nat.*  
266 **103**, 91–93 (1969). doi:10.1086/282586.
- 267 2. M. E. Power, D. Tilman, J. A. Estes, B. A. Menge, W. J. Bond, L. S. Mills, G.  
268 Daily, J. C. Castilla, J. Lubchenco, R. T. Paine, Challenges in the quest for  
269 keystones. *Bioscience*. **46**, 609–620 (1996). doi:10.2307/1312990.
- 270 3. H. E. W. Cottee-Jones, R. J. Whittaker, The keystone species concept: a

- 271 critical appraisal. *Front. Biogeogr.* **4**, 117–127 (2012).  
272 doi:10.21425/F5FBG12533.
- 273 4. J. H. Lawton, What do species do in ecosystems? *Oikos*. **71**, 367 (1994).  
274 doi:10.2307/3545824.
- 275 5. T. M. Knight, M. W. McCoy, J. M. Chase, K. A. McCoy, R. D. Holt, Trophic  
276 cascades across ecosystems. *Nature*. **437**, 880–883 (2005).  
277 doi:10.1038/nature03962.
- 278 6. A. Eklöf, U. Jacob, J. Kopp, J. Bosch, R. Castro-Urgal, N. P. Chacoff, B.  
279 Dalsgaard, C. de Sassi, M. Galetti, P. R. Guimarães, S. B. Lomáscolo, A. M.  
280 Martín González, M. A. Pizo, R. Rader, A. Rodrigo, J. M. Tylianakis, D. P.  
281 Vázquez, S. Allesina, The dimensionality of ecological networks. *Ecol. Lett.*  
282 **16**, 577–583 (2013). doi:10.1111/ele.12081.
- 283 7. D. M. Dehling, D. B. Stouffer, Bringing the Eltonian niche into functional  
284 diversity. *Oikos*. **127**, 1711–1723 (2018). doi:10.1111/oik.05415.
- 285 8. R. H. Heleno, G. Ross, A. Everard, J. Memmott, J. A. Ramos, The role of  
286 avian ‘seed predators’ as seed dispersers. *Ibis (Lond. 1859)*. **153**, 199–203  
287 (2011). doi:10.1111/j.1474-919X.2010.01088.x.
- 288 9. L. P. da Silva, J. A. Ramos, J. M. Olesen, A. Traveset, R. H. Heleno, Flower  
289 visitation by birds in Europe. *Oikos*. **123**, 1377–1383 (2014).  
290 doi:10.1111/oik.01347.
- 291 10. Ç. H. Şekercioğlu, D. G. Wenny, C. J. Whelan, *Why birds matter: Avian*  
292 *ecological function and ecosystem services* (University of Chicago Press,  
293 Chicago, IL, ed. 1, 2016).
- 294 11. S. Seibold, M. W. Cadotte, J. S. Maclvor, S. Thorn, J. Müller, The necessity  
295 of multitrophic approaches in community ecology. *Trends Ecol. Evol.* **33**,  
296 754–764 (2018). doi:10.1016/j.tree.2018.07.001.
- 297 12. R. Heleno, C. Garcia, P. Jordano, A. Traveset, J. M. Gómez, N. Blüthgen, J.  
298 Memmott, M. Moora, J. Cerdeira, S. Rodríguez-Echeverría, H. Freitas, J. M.  
299 Olesen, Ecological networks: delving into the architecture of biodiversity.  
300 *Biol. Lett.* **10**, 20131000 (2014). doi:10.1098/rsbl.2013.1000.
- 301 13. P. Jordano, J. Bascompte, J. M. Olesen, Invariant properties in

- 302 coevolutionary networks of plant – animal interactions. *Ecol. Lett.* **6**, 69–81  
303 (2003). doi:10.1046/j.1461-0248.2003.00403.x.
- 304 14. C. Tur, R. Castro-Urgal, A. Traveset, Linking plant specialization to  
305 dependence in interactions for seed set in pollination networks. *PLoS One.* **8**  
306 (2013), doi:10.1371/journal.pone.0078294.  
307 doi:10.1371/journal.pone.0078294.
- 308 15. S. Timóteo, J. A. Ramos, I. P. Vaughan, J. Memmott, High resilience of seed  
309 dispersal webs highlighted by the experimental removal of the dominant  
310 disperser. *Curr. Biol.* **26**, 910–915 (2016). doi:10.1016/j.cub.2016.01.046.
- 311 16. K. S. E. Henson, P. G. Craze, J. Memmott, The restoration of parasites,  
312 parasitoids, and pathogens to heathland communities. *Ecology.* **90**, 1840–  
313 1851 (2009). doi:10.1890/07-2108.1.
- 314 17. C. M. Genrich, M. A. R. Mello, F. A. O. Silveira, J. L. Bronstein, A. P. Paglia,  
315 Duality of interaction outcomes in a plant-frugivore multilayer network. *Oikos.*  
316 **126**, 361–368 (2017). doi:10.1111/oik.03825.
- 317 18. J. M. Olesen, C. F. Damgaard, F. Fuster, R. H. Heleno, M. Nogales, B.  
318 Rumeu, K. Trøjelsgaard, P. Vargas, A. Traveset, Disclosing the double  
319 mutualist role of birds on Galápagos. *Sci. Rep.* **8**, 57 (2018).  
320 doi:10.1038/s41598-017-17592-8.
- 321 19. M. A. R. Mello, G. M. Felix, R. B. P. Pinheiro, R. L. Muylaert, C. Geiselman,  
322 S. E. Santana, M. Tschapka, N. Lotfi, F. A. Rodrigues, R. D. Stevens,  
323 Insights into the assembly rules of a continent-wide multilayer network. *Nat.*  
324 *Ecol. Evol.* **3**, 1525–1532 (2019). doi:10.1038/s41559-019-1002-3.
- 325 20. M. Correia, S. Rodríguez-Echeverría, S. Timóteo, H. Freitas, R. Heleno,  
326 Integrating plant species contribution to mycorrhizal and seed dispersal  
327 mutualistic networks. *Biol. Lett.* **15**, 20180770 (2019).  
328 doi:10.1098/rsbl.2018.0770.
- 329 21. B. Rumeu, M. Devoto, A. Traveset, J. M. Olesen, P. Vargas, M. Nogales, R.  
330 Heleno, Predicting the consequences of disperser extinction: richness  
331 matters the most when abundance is low. *Funct. Ecol.* **31**, 1910–1920  
332 (2017). doi:10.1111/1365-2435.12897.

- 333 22. A. Schuldt, T. Assmann, M. Brezzi, F. Buscot, D. Eichenberg, J. Gutknecht,  
334 W. Härdtle, J.-S. He, A.-M. Klein, P. Kühn, X. Liu, K. Ma, P. A. Niklaus, K. A.  
335 Pietsch, W. Purahong, M. Scherer-Lorenzen, B. Schmid, T. Scholten, M.  
336 Staab, Z. Tang, S. Trogisch, G. von Oheimb, C. Wirth, T. Wubet, C.-D. Zhu,  
337 H. Bruelheide, Biodiversity across trophic levels drives multifunctionality in  
338 highly diverse forests. *Nat. Commun.* **9**, 2989 (2018). doi:10.1038/s41467-  
339 018-05421-z.
- 340 23. D. Kleijn, R. Winfree, I. Bartomeus, L. G. Carvalheiro, M. Henry, R. Isaacs,  
341 A.-M. Klein, C. Kremen, L. K. M'Gonigle, R. Rader, T. H. Ricketts, N. M.  
342 Williams, N. Lee Adamson, J. S. Ascher, A. Báldi, P. Batáry, F. Benjamin, J.  
343 C. Biesmeijer, E. J. Blitzer, R. Bommarco, M. R. Brand, V. Bretagnolle, L.  
344 Button, D. P. Cariveau, R. Chifflet, J. F. Colville, B. N. Danforth, E. Elle, M. P.  
345 D. Garratt, F. Herzog, A. Holzschuh, B. G. Howlett, F. Jauker, S. Jha, E.  
346 Knop, K. M. Krewenka, V. Le Féon, Y. Mandelik, E. A. May, M. G. Park, G.  
347 Pisanty, M. Reemer, V. Riedinger, O. Rollin, M. Rundlöf, H. S. Sardiñas, J.  
348 Scheper, A. R. Sciligo, H. G. Smith, I. Steffan-Dewenter, R. Thorp, T.  
349 Tscharrntke, J. Verhulst, B. F. Viana, B. E. Vaissière, R. Veldtman, K. L.  
350 Ward, C. Westphal, S. G. Potts, Delivery of crop pollination services is an  
351 insufficient argument for wild pollinator conservation. *Nat. Commun.* **6**, 7414  
352 (2015). doi:10.1038/ncomms8414.
- 353 24. S. P. Hubbell, Neutral theory and the evolution of ecological equivalence.  
354 *Ecology*. **87**, 1387–1398 (2006). doi:10.1890/0012-  
355 9658(2006)87[1387:NTATEO]2.0.CO;2.
- 356 25. P. P. A. Staniczenko, J. C. Kopp, S. Allesina, The ghost of nestedness in  
357 ecological networks. *Nat. Commun.* **4**, 1391 (2013).  
358 doi:10.1038/ncomms2422.
- 359 26. Materials and methods are available as supplementary materials.
- 360 27. J. Bascompte, P. Jordano, J. M. Olesen, Asymmetric coevolutionary  
361 networks facilitate biodiversity maintenance. *Science (80-. )*. **312**, 431–433  
362 (2006). doi:10.1126/science.1123412.
- 363 28. C. Fontaine, P. R. Guimarães, S. Kéfi, N. Loeuille, J. Memmott, W. H. van

- 364 der Putten, F. J. F. van Veen, E. Thébault, The ecological and evolutionary  
365 implications of merging different types of networks. *Ecol. Lett.* **14**, 1170–1181  
366 (2011). doi:10.1111/j.1461-0248.2011.01688.x.
- 367 29. R. H. Heleno, W. J. Ripple, A. Traveset, Scientists' warning on endangered  
368 food webs. *Web Ecol.* **20**, 1–10 (2020). doi:10.5194/we-20-1-2020.
- 369 30. H. M. Schaefer, G. D. Ruxton, *Plant-Animal Communication* (Oxford  
370 University Press, Oxford, UK, ed. 1, 2011;  
371 <https://oxford.universitypressscholarship.com/view/10.1093/acprof:osobl/9780199563609.001.0001/acprof-9780199563609>).  
372 doi:10.1093/acprof:osobl/9780199563609.001.0001.
- 373
- 374 31. P. Glaum, A. Kessler, Functional reduction in pollination through herbivore-  
375 induced pollinator limitation and its potential in mutualist communities. *Nat.*  
376 *Commun.* **8**, 2031 (2017). doi:10.1038/s41467-017-02072-4.
- 377 32. S. E. Ramos, F. P. Schiestl, Rapid plant evolution driven by the interaction of  
378 pollination and herbivory. *Science (80-. )*. **364**, 193–196 (2019).  
379 doi:10.1126/science.aav6962.
- 380 33. S. Hervías-Parejo, C. Tur, R. Heleno, M. Nogales, S. Timóteo, A. Traveset,  
381 Species functional traits and abundance as drivers of multiplex ecological  
382 networks: first empirical quantification of inter-layer edge weights. *Proc. R.*  
383 *Soc. B Biol. Sci.* **287**, 20202127 (2020). doi:10.1098/rspb.2020.2127.
- 384 34. D. Simberloff, Flagships, umbrellas, and keystones: Is single-species  
385 management passé in the landscape era? *Biol. Conserv.* **83**, 247–257  
386 (1998). doi:10.1016/S0006-3207(97)00081-5.
- 387 35. M. J. O. Pocock, D. M. Evans, J. Memmott, The Robustness and Restoration  
388 of a Network of Ecological Networks. *Science (80-. )*. **335**, 973–977 (2012).  
389 doi:10.1126/science.1214915.
- 390 36. F. Fornoff, A.-M. Klein, N. Blüthgen, M. Staab, Tree diversity increases  
391 robustness of multi-trophic interactions. *Proc. R. Soc. B Biol. Sci.* **286**,  
392 20182399 (2019). doi:10.1098/rspb.2018.2399.
- 393 37. A. S. Mori, F. Isbell, S. Fujii, K. Makoto, S. Matsuoka, T. Osono, Low  
394 multifunctional redundancy of soil fungal diversity at multiple scales. *Ecol.*



- 395 *Lett.* **19**, 249–259 (2016). doi:10.1111/ele.12560.
- 396 38. M. Albrecht, P. Duelli, Interaction diversity within quantified insect food webs  
397 in restored and adjacent intensively managed meadows. *J. Anim. Ecol.* **76**,  
398 1015–1025 (2007). doi:10.1111/j.1365-2656.2007.01264x.
- 399 39. N. M. Waser, J. Ollerton, *Plant-pollinator interactions: from specialization to*  
400 *generalization* (University of Chicago Press, Chicago, IL, USA, ed. 1, 2006).
- 401 40. M. M. Pires, P. R. Guimaraes, Interaction intimacy organizes networks of  
402 antagonistic interactions in different ways. *J. R. Soc. Interface.* **10**, 20120649  
403 (2012). doi:10.1098/rsif.2012.0649.
- 404 41. D. P. Vázquez, C. J. Melián, N. M. Williams, N. Blüthgen, B. R. Krasnov, R.  
405 Poulin, Species abundance and asymmetric interaction strength in ecological  
406 networks. *Oikos.* **116**, 1120–1127 (2007). doi:10.1111/j.2007.0030-  
407 1299.15828.x.
- 408 42. A. M. C. Sauve, E. Thébault, M. J. O. Pocock, C. Fontaine, How plants  
409 connect pollination and herbivory networks and their contribution to  
410 community stability. *Ecology.* **97**, 908–917 (2016). doi:10.1890/15-0132.1.
- 411 43. R Development Core Team, R: A language and environment for statistical  
412 computing (2021), (available at <http://www.r-project.org/>).
- 413 44. N. Blüthgen, Why network analysis is often disconnected from community  
414 ecology: A critique and an ecologist's guide. *Basic Appl. Ecol.* **11**, 185–195  
415 (2010). doi:10.1016/j.baae.2010.01.001.
- 416 45. C. F. Dormann, B. Gruber, J. Fründ, Introducing the bipartite package:  
417 analysing ecological networks. *R News.* **8**, 8–11 (2008).
- 418 46. R. A. Fisher, On the “probable error” of a coefficient of correlation deduced  
419 from a small sample. *Metron.* **1**, 3–32 (1921).
- 420 47. J. E. Hunter, F. L. Schmidt, Fixed effects vs. random effects meta-analysis  
421 models: Implications for cumulative research knowledge. *Int. J. Sel. Assess.*  
422 **8**, 275–292 (2000). doi:10.1111/1468-2389.00156.
- 423 48. F. L. Schmidt, I.-S. Oh, T. L. Hayes, Fixed- versus random-effects models in  
424 meta-analysis: Model properties and an empirical comparison of differences  
425 in results. *Br. J. Math. Stat. Psychol.* **62**, 97–128 (2009).

- 426 doi:10.1348/000711007X255327.
- 427 49. A. P. Field, Is the meta-analysis of correlation coefficients accurate when  
428 population correlations vary? *Psychol. Methods*. **10**, 444–467 (2005).  
429 doi:10.1037/1082-989X.10.4.444.
- 430 50. J. P. T. Higgins, S. G. Thompson, Quantifying heterogeneity in a meta-  
431 analysis. *Stat. Med.* **21**, 1539–1558 (2002). doi:10.1002/sim.1186.
- 432 51. W. Viechtbauer, Conducting meta-analyses in R with the metafor package. *J.*  
433 *Stat. Softw.* **36**, 1–48 (2010). doi:10.18637/jss.v036.i03.
- 434 52. R. H. Heleno, J. A. Ramos, J. Memmott, Integration of exotic seeds into an  
435 Azorean seed dispersal network. *Biol. Invasions*. **15**, 1143–1154 (2013).  
436 doi:10.1007/s10530-012-0357-z.
- 437 53. R. Heleno, I. Lacerda, J. A. Ramos, J. Memmott, Evaluation of restoration  
438 effectiveness: community response to the removal of alien plants. *Ecol. Appl.*  
439 **20**, 1191–203 (2010). doi:10.1890/09-1384.1.
- 440 54. R. H. Heleno, R. S. Ceia, J. A. Ramos, J. Memmott, Effects of alien plants on  
441 insect abundance and biomass: a food-web approach. *Conserv. Biol.* **23**,  
442 410–419 (2009). doi:10.1111/j.1523-1739.2008.01129.x.
- 443 55. R. H. Heleno, J. M. Olesen, M. Nogales, P. Vargas, A. Traveset, Seed  
444 dispersal networks in the Galapagos and the consequences of alien plant  
445 invasions. *Proc. R. Soc. B Biol. Sci.* **280**, 20122112–20122112 (2012).  
446 doi:10.1098/rspb.2012.2112.
- 447 56. A. Traveset, S. Chamorro, J. M. Olesen, R. Heleno, Space, time and aliens:  
448 charting the dynamic structure of Galápagos pollination networks. *AoB*  
449 *Plants*. **7**, plv068 (2015). doi:10.1093/aobpla/plv068.
- 450 57. L. G. Carvalheiro, Y. M. Buckley, J. Memmott, Diet breadth influences how  
451 the impact of invasive plants is propagated through food webs. *Ecology*. **91**,  
452 1063–1074 (2010). doi:10.1890/08-2092.1.
- 453 58. M. J. O. Pocock, D. M. Evans, J. Memmott, The impact of farm management  
454 on species-specific leaf area index (LAI): Farm-scale data and predictive  
455 models. *Agric. Ecosyst. Environ.* **135**, 279–287 (2010).  
456 doi:10.1016/j.agee.2009.10.006.



- 457 59. N. Blüthgen, D. Mezger, K. E. Linsenmair, Ant-hemipteran trophobioses in a  
458 Bornean rainforest - diversity, specificity and monopolisation. *Insectes Soc.*  
459 **53**, 194–203 (2006). doi:10.1007/s00040-005-0858-1.
- 460 60. A. C. Norte, I. L. de Carvalho, J. A. Ramos, M. Gonçalves, L. Gern, M. S.  
461 Nuncio, Diversity and seasonal patterns of ticks parasitizing wild birds in  
462 western Portugal. *Exp. Appl. Acarol.* **58**, 327–339 (2012).  
463 doi:10.1007/s10493-012-9583-4.
- 464 61. F. A. López-Núñez, R. H. Heleno, S. Ribeiro, H. Marchante, E. Marchante,  
465 Four-trophic level food webs reveal the cascading impacts of an invasive  
466 plant targeted for biocontrol. *Ecology.* **98**, 782–793 (2017).  
467 doi:10.1002/ecy.1701.
- 468 62. M. L. Henneman, J. Memmott, Infiltration of a Hawaiian Community by  
469 Introduced Biological Control Agents. *Science (80-. ).* **293**, 1314–1316  
470 (2001). doi:10.1126/science.1060788.
- 471 63. S. Macfadyen, R. Gibson, A. Polaszek, R. J. Morris, P. G. Craze, R.  
472 Planqué, W. O. C. Symondson, J. Memmott, Do differences in food web  
473 structure between organic and conventional farms affect the ecosystem  
474 service of pest control? *Ecol. Lett.* **12**, 229–238 (2009). doi:10.1111/j.1461-  
475 0248.2008.01279.x.
- 476 64. J. Albrecht, D. Gertrud Berens, B. Jaroszewicz, N. Selva, R. Brandl, N.  
477 Farwig, Correlated loss of ecosystem services in coupled mutualistic  
478 networks. *Nat. Commun.* **5**, 3810 (2014). doi:10.1038/ncomms4810.
- 479 65. C. M. Frost, G. Peralta, T. A. Rand, R. K. Didham, A. Varsani, J. M.  
480 Tylianakis, Apparent competition drives community-wide parasitism rates  
481 and changes in host abundance across ecosystem boundaries. *Nat.*  
482 *Commun.* **7**, 12644 (2016). doi:10.1038/ncomms12644.
- 483 66. G. Peralta, C. M. Frost, T. A. Rand, R. K. Didham, J. M. Tylianakis,  
484 Complementarity and redundancy of interactions enhance attack rates and  
485 spatial stability in host–parasitoid food webs. *Ecology.* **95**, 1888–1896  
486 (2014). doi:10.1890/13-1569.1.
- 487

488 **Acknowledgments:**

489 **Funding:**

490 ANC was supported by the Portuguese Science Foundation – FCT/MCTES  
491 (transitory norm contract DL57/2016/CP1370/CT89).

492 AT was supported by CGL-2017- 88122-P from the Spanish Ministry of Science.

493 BR was supported by the ‘Juan de la Cierva Incorporación’ fellowship (Spanish  
494 MICIU, IJCI-2017-33475).

495 EM, FALN, RH, SRE and ST were supported by the Portuguese Science  
496 Foundation – FCT/MCTES (grants PTDC/AAG-REC/4896/2014,  
497 SFRH/BD/130942/2017, CEECIND/00092/2017, IF/00462/2013,  
498 CEECIND/00135/2017, respectively, and all by grant UID/BIA/04004/2020).

499 LPS was supported by the Portuguese Science Foundation – FCT/MCTES  
500 (CEECIND/02064/2017).

501 LGC was supported by the Portuguese Science Foundation – FCT/MCTES via the  
502 EU Lisbon 2020 program (project EUCLIPO-028360), and by the Brazilian National  
503 Council for Scientific and Technological Development (CNPq. Universal  
504 421668/2018-0; PQ 305157/2018-3).

505

506 **Author contributions:**

507 RH, ST, JA, BR, and LGC conceived the research idea.

508 ST and JA developed and implemented the statistical analysis.

509 ST wrote the manuscript.

510 All authors contributed data, discussed, and reviewed the manuscript.

511

512 **Competing interests:** Authors declare no competing interests.

513

514 **Data and materials availability:** The datasets used in this work are available from  
515 <https://doi.org/10.6084/m9.figshare.14333198>. The R code used to perform the  
516 meta-analysis and generate forest plot is available from  
517 <https://doi.org/10.6084/m9.figshare.14334038>.

518

519 **Supplementary Materials**

520 Materials and Methods

521 Tables S1-S3

522 References 39-66

523

524

525

526

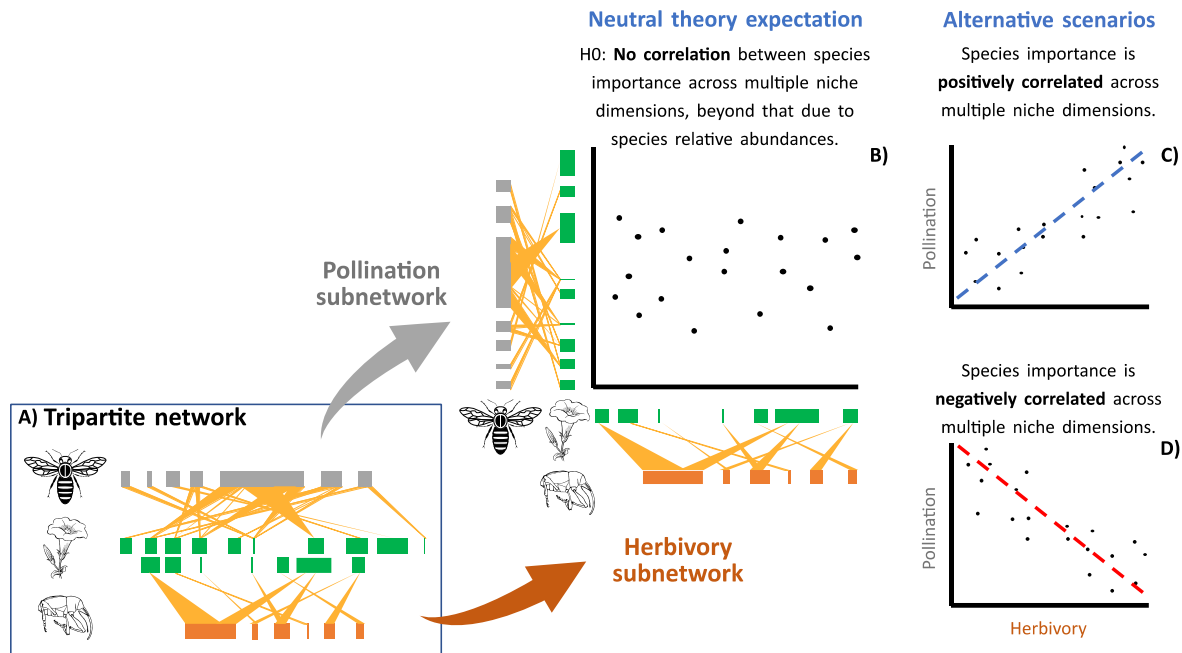

527

528 **Fig. 1. Conceptual model for the importance of species participating in more**  
529 **than one ecological function, in a tripartite network.**

530 Panel A shows an example of a tripartite network composed of two bipartite  
531 subnetworks representing pollination (top) and herbivory (bottom). Grey, green and  
532 orange boxes represent species of pollinators, plants, and herbivores, respectively,  
533 while yellow lines represent the interactions between species. The importance of  
534 each species in the intermediate level (plants in the present example) can be  
535 assessed by calculating species strength (27), after normalizing matrices according  
536 to the mass action hypothesis, which accounts for species relative abundances  
537 (25). Panels B, C and D represent alternative hypotheses regarding the correlation  
538 of species importance across each paired subnetwork, namely: B) species  
539 importance in both sub networks is independent; C) species importance is  
540 positively correlated between the two considered functions, i.e. keystone species  
541 (top right) are equally relevant for both dimensions; and D) species importance is  
542 negatively correlated between the two considered functions, i.e. keystone species  
543 are only relevant either for pollination or for herbivory, but not for both dimensions  
544 simultaneously.

545 Silhouettes used in this figure sourced from Open Clipart and available under a  
546 CC0 1.0 licence.

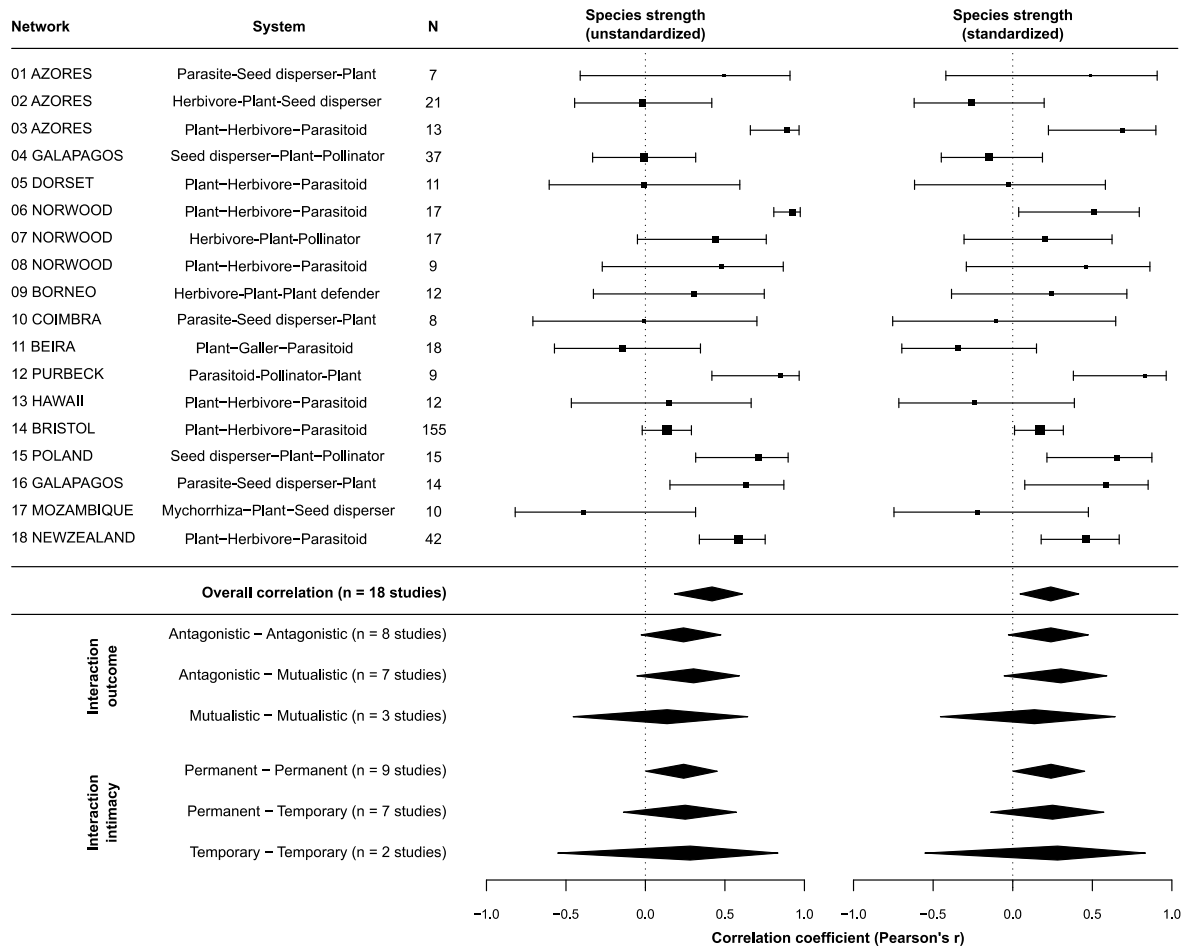

547

548 **Fig. 2. Forest plot with the results of the meta-analysis.**

549 Results of the meta-analysis on the Pearson's correlation coefficient ( $r$ ) of species  
550 strength for species participating in paired ecological functions (subnetworks) in 18  
551 tripartite networks (i.e., interface species) (Table 1). **N** is the number of species  
552 common to both subnetworks. The correlation coefficient of each tripartite network  
553 is represented by the square at the centre of the 95% confidence interval and its  
554 size is proportional to **N**. Diamonds represent the overall weighted correlation  
555 coefficient and its 95% confidence interval (individual values in Table S2).

556

557 **Table 1. Results of the meta-analysis of the tripartite networks.** The random model is the model without moderators and  
 558 includes all studies. The subsequent rows present the models for each combination of interaction outcome and intimacy, each with  
 559 three combinations of interactions. Pearson's *r* is the overall correlation coefficient [95% confidence interval] of each model; *df* are  
 560 the degrees of freedom of the model; *I*<sup>2</sup> is the heterogeneity among correlation coefficients that is not due random sampling  
 561 variance; *n* is the number of studies included in each model; *QM* is the amount of heterogeneity accounted by moderators; *p* is  
 562 significance of the Q-test for heterogeneity; and *QE* is the amount of heterogeneity across studies included in the models. For full  
 563 results of the meta-analytical models see Table S3 in Supporting Information. Correlations for which the 95% confidence interval did  
 564 not overlap zero are given in bold.

|                                                     | Species strength<br>(unstandardized)               |                       | Species strength<br>(standardized by abundance)    |                       |
|-----------------------------------------------------|----------------------------------------------------|-----------------------|----------------------------------------------------|-----------------------|
|                                                     | Pearson's <i>r</i>                                 | <i>I</i> <sup>2</sup> | Pearson's <i>r</i>                                 | <i>I</i> <sup>2</sup> |
| Random effects model (no moderators, <i>n</i> = 18) | <b>0.42 [0.18, 0.61]</b>                           | 50.2%                 | <b>0.24 [0.05, 0.42]</b>                           | 63.3%                 |
| Test for heterogeneity between studies              | QE = 72.403, <i>df</i> = 17, <i>p</i> < 0.001      |                       | QE = 39.524, <i>df</i> = 17, <i>p</i> = 0.002      |                       |
| Subgroups: Interaction outcome                      |                                                    |                       |                                                    |                       |
| Antagonistic + Antagonistic ( <i>n</i> = 8)         | <b>0.50 [0.08, 0.76]</b>                           | 88.8%                 | <b>0.24 [-0.03, 0.48]</b>                          | 65.2%                 |
| Antagonistic + Mutualistic ( <i>n</i> = 7)          | <b>0.41 [0.12, 0.64]</b>                           | 38.9%                 | 0.30 [-0.05, 0.59]                                 | 53.7%                 |
| Mutualistic + Mutualistic ( <i>n</i> = 3)           | 0.17 [-0.50, 0.71]                                 | 81.9%                 | 0.14 [-0.45, 0.64]                                 | 76.0%                 |
| Test for difference between subgroups               | <i>QM</i> = 0.892, <i>df</i> = 2, <i>p</i> = 0.640 |                       | <i>QM</i> = 0.327, <i>df</i> = 2, <i>p</i> = 0.849 |                       |
| Subgroups: Interaction intimacy                     |                                                    |                       |                                                    |                       |
| Permanent + Permanent ( <i>n</i> = 9)               | <b>0.48 [0.11, 0.73]</b>                           | 86.7%                 | <b>0.24 [0.00, 0.45]</b>                           | 58.1%                 |
| Permanent + Temporary ( <i>n</i> = 7)               | 0.34 [-0.04, 0.63]                                 | 58.5%                 | 0.25 [-0.14, 0.57]                                 | 58.6%                 |
| Temporary + Temporary ( <i>n</i> = 2)               | 0.39 [-0.44, 0.86]                                 | 86.2%                 | 0.28 [-0.55, 0.83]                                 | 87.0%                 |
| Test for difference between subgroups               | <i>QM</i> = 0.287, <i>df</i> = 2, <i>p</i> = 0.867 |                       | <i>QM</i> = 0.001, <i>df</i> = 2, <i>p</i> = 0.999 |                       |

## Supplementary Materials for

### **Tripartite networks show that keystone species can multitask**

Sérgio Timóteo<sup>1\*</sup>, Jörg Albrecht<sup>2</sup>, Beatriz Rumeu<sup>3</sup>, Ana C. Norte<sup>4</sup>, Anna Traveset<sup>5</sup>, Carol M. Frost<sup>6</sup>, Elizabete Marchante<sup>1</sup>, Francisco A. López-Núñez<sup>1</sup>, Guadalupe Peralta<sup>7</sup>, Jane Memmott<sup>8</sup>, Jens M. Olesen<sup>9</sup>, José M. Costa<sup>1</sup>, Luís P. da Silva<sup>10</sup>, Luísa G. Carvalheiro<sup>11,12</sup>, Marta Correia<sup>1</sup>, Michael Staab<sup>13</sup>, Nico Blüthgen<sup>13</sup>, Nina Farwig<sup>14</sup>, Sergei Mironov<sup>15</sup>, Susana Rodríguez-Echeverría<sup>1</sup> and Ruben Heleno<sup>1</sup>

\*Correspondence to: Sérgio Timóteo; Email: [sergio.timoteo@uc.pt](mailto:sergio.timoteo@uc.pt)

This PDF includes:

Material and Methods

Tables S1-S3

References 39-66

## 1 **Materials and Methods**

### 2 Data set

3 We assembled a global dataset comprising 18 quantitative tripartite networks,  
4 each composed of two bipartite subnetworks, representing distinct types of  
5 interaction. Overall, these networks encompass six distinct interaction types:  
6 herbivory, parasitism, seed dispersal, pollination, commensalism, and  
7 arbuscular mycorrhizal association (Table S1). Sampling of both subnetworks  
8 coincided in time and space for each tripartite network. When studies included  
9 data from nearby plots/sites, these were pooled together, after checking if such  
10 pooling made biological/ecological sense (i.e., if those species and interactions  
11 can be considered as part of the same community). In order to explore the  
12 potential underlying patterns explaining eventual correlations between species  
13 importance across their niche dimensions, we characterized each tripartite  
14 network regarding the interaction outcome and intimacy of its subnetworks  
15 (Table 1), using these as moderators (i.e., variables driving the variation  
16 between studies) in a meta-analysis. Interaction outcomes were classified as  
17 either antagonistic or mutualistic, resulting in three combinations of outcomes:  
18 antagonistic-antagonistic, antagonistic-mutualistic, and mutualistic-mutualistic.  
19 Interaction intimacy describes “the degree of physical proximity or integration of  
20 partner taxa during their life cycles” (39). Because we had access to a limited  
21 number of tripartite networks, we followed a conservative approach and  
22 classified the degree of interaction intimacy as permanent (high intimacy) or  
23 temporary (low intimacy) (28, 40). Permanent interactions are those in which  
24 one of the partners is physically or physiologically dependent of the other for a  
25 significant proportion of their life cycles (e.g., the interaction between  
26 mycorrhizal fungi and plants, or parasitoids and their hosts), and temporary  
27 interactions are those where such dependencies are restricted to short periods  
28 of phenological matching (e.g., the interaction between plants and their  
29 pollinators or seed dispersers). This classification resulted in three combinations  
30 of intimacy levels: permanent-permanent, permanent-temporary, and  
31 temporary-temporary.

32

33 Standardizing interaction matrices and species preferences



34 In order to estimate interaction preferences that are independent of species  
35 relative abundances, we standardized all network matrices according to the  
36 “mass action hypothesis” (following 25). The mass action hypothesis states that  
37 species local abundances drive the probability of encounter between two  
38 species, and that deviations from this assumption are due to species interaction  
39 preferences (25). The networks included in this study were assembled  
40 independently for various purposes and include a plethora of sampling  
41 techniques to quantify interaction frequencies, which is in turn affected by  
42 species relative abundances (41, 42). In addition, this standardization  
43 procedure also has the advantage of converting all interaction frequencies to  
44 the same currency.

45 If we have a quantitative species interaction matrix  $B$ , each entry  $B_{i,j}$  of this  
46 matrix encodes the weight of the interaction between species  $i$  and  $j$  that can be  
47 decomposed into species interaction preferences ( $\gamma_{i,j}$ ) and mass action ( $x_i x_j$ , the  
48 product of the effective abundances of the interacting species), that is

$$49 \quad B_{i,j} = \gamma_{i,j} x_i x_j.$$

50 We can then remove the effect of species effective abundances and rescale  
51 matrices to obtain estimates of species preferences:

$$52 \quad \gamma_{i,j} = \frac{B_{i,j}}{x_i x_j}.$$

53 If an interaction is not recorded  $B_{i,j} = 0$  then  $\gamma_{i,j} = 0$ ; otherwise, when an  
54 interaction is present,  $B_{i,j} > 0$  and  $\gamma_{i,j} \neq 0$ . In the latter case, we apply a logarithm  
55 transformation obtaining:

$$56 \quad \log B_{i,j} = \log \gamma_{i,j} + \log x_i + \log x_j,$$

57 which under the mass action hypothesis is  $\log \gamma_{i,j} = 0$ , thus  $\gamma_{i,j} = 1$ .

58 We can re-arrange the log-equation as follows:

$$59 \quad Y_{i,j} = \alpha_{i,j} X_i + \beta_{i,j} X_j + \epsilon_{i,j},$$

60 where  $\alpha_{i,j}$  and  $\beta_{i,j}$  are regression coefficients,  $X_i$  and  $Y_j$  are estimates of the  
61 abundances of the interacting species and are unknown, and  $\epsilon_{i,j}$  is an error term

62 that correspond to the interaction preferences. We seek to find the best-fit for  $X_i$   
63 and  $Y_j$  by minimizing the errors  $\varepsilon$ . When no errors exist, the standardized matrix  
64 is binary, with recorded interactions having  $\gamma_{i,j} = 1$ , and interactions are neutral  
65 and result exclusively from the probabilistic encounter between species, i.e.,  
66 mass action effect. If errors are present, the solution for the best-fit for  $X_i$  and  $Y_j$   
67 will result in at least some interactions having  $\gamma_{i,j} \neq 0$ , with interaction  
68 preferences being indicated by  $\gamma_{i,j} > 1$  and averted interactions indicated by  $\gamma_{i,j} <$   
69 1. Interaction preference matrices were calculated in R (43) using the function  
70 *GetPreference* (25). This approach has the advantage of removing the effect of  
71 abundance on interaction frequency, which is essential for the accurate  
72 characterization of keystone species.

73

#### 74 Estimating species importance

75 Once subnetworks were standardized, we proceeded to quantify the importance  
76 of each species at the interface of the two subnetworks for both dimensions of  
77 their niche (i.e., for the two subnetworks). Thus, for both the unstandardized  
78 and standardized subnetworks, we quantified the importance of all species at  
79 the interface of the two subnetworks, by calculating a key species-level  
80 descriptor, namely species strength (27). Species strength is a particularly  
81 useful index quantify the importance of species to the entire assemblage of  
82 interacting partners from other trophic level in a given network (15, 18, 41, 44).  
83 For example, in an herbivore-plant-pollinator network, species strength was  
84 computed twice for each plant: firstly, reflecting its importance as a resource for  
85 the pollinator community, and secondly, reflecting its importance as a resource  
86 for the herbivore community. Species strength based on matrices that have  
87 been standardized by mass effects (i.e., abundance) is explicitly referred to as  
88 standardized species strength. The calculation of this descriptor requires to  
89 calculate the dependence of each species  $i$ , from a given network level, on each  
90 species  $j$  from the other network level:

$$91 \quad b_{ij} = \frac{a_{ij}}{A_i},$$

92 with  $A_i$  being the sum of all interactions by species  $i$ ,  $a_{ij}$  the interaction frequency  
93 between  $i$  and species  $j$ . Species strength is then the sum of the dependencies  
94 of species  $i$  on all species  $j$  from the other trophic level:

$$95 \quad \text{Species strength}_i = \sum_{j=1}^I b_{i,j}.$$

96 Species strength was calculated with the R package *bipartite* v2.08 (45).

97

## 98 Meta-analysis

99 For those species at the interface of each tripartite network, we calculated  
100 Pearson's correlation coefficient between their values of species strength for the  
101 two subnetworks, using both the unstandardized and standardized matrices.

102 Species strength often presents a skewed distribution, and therefore was log-  
103 transformed to comply with the assumptions of Pearson's correlation. We used  
104 a paired  $t$ -test to assess if the correlations from unstandardized and  
105 standardized matrices differed.

106 To estimate the overall correlation across all tripartite networks we performed a  
107 meta-analysis and estimated the associated variance and 95% confidence  
108 intervals. Pearson's coefficients were standardized using a Fisher's  $r$ -to- $Z$   
109 transformation, which stabilizes the variance of the coefficients (46), that is  
110 obtained by:

$$111 \quad z_{r_i} = 1/2 \log e \left( \frac{1 + r_i}{1 - r_i} \right),$$

112 where  $r_i$  is the Pearson correlation coefficient of the individual studies, with an  
113 approximate normal distribution with variance:

$$114 \quad w_i = 1/n_i - 3,$$

115 where  $n_i$  is the sample size of the individual studies (in the present study the  
116 number of species participating in both functions and from which the  
117 correlations were calculated).

118 First, we implemented a random-effect model without moderators, which  
119 assumes that effect sizes come from different populations (47, 48). In this  
120 model, the contribution of each study is weighted by its estimated variance,

121 reducing the influence of studies with low sample sizes. The transformed effect  
122 sizes (i.e., Z-transformed Pearson's coefficients) are then used to calculate an  
123 average effect size, with each correlation coefficient weighted by the inverse of  
124 the within-study variance of the study from which it came from.

$$125 \quad \bar{Z}_r = \frac{\sum_{i=1}^k w_i Z_{r_i}}{\sum_{i=1}^k w_i}$$

126 This results in individual z-values with small variances having greater weights  
127 than those with large variances (49). Coefficients were considered statistically  
128 different from zero if confidence intervals did not overlap zero. In reporting  
129 results and their visual representation, Pearson's coefficients and  
130 corresponding 95% confidence intervals were back-transformed according to:

$$131 \quad r_i = \frac{e^{(2z_i)} - 1}{e^{(2z_i)} + 1}.$$

132 Second, we conducted a subgroup analysis to separately estimate the pooled  
133 correlation coefficient for each combination of interaction outcome (i.e.,  
134 antagonistic-antagonistic, antagonistic-mutualistic, mutualistic-mutualistic) and  
135 for each combination of interaction intimacy (i.e., permanent-permanent,  
136 permanent-temporary, temporary-temporary). Finally, we used a mixed effects  
137 model to test whether the sign and magnitude of the correlation differed  
138 between the subgroups, i.e., between the different combinations of interaction  
139 outcome or intimacy. In this way, we allowed the within-group variances to vary  
140 between subgroups. To avoid overfitting, we included either interaction outcome  
141 or intimacy, but not both variables simultaneously, as moderators into the  
142 model.

143 We used the Cochran's Q-test (50), to test whether correlations were  
144 heterogeneous across the tripartite networks, with a significant result indicating  
145 the presence of heterogeneity (QE), i.e., the existence of differences in  
146 correlation coefficients between studies. We estimated the  $I^2$  statistic to quantify  
147 the proportion of the total variance resulting from true heterogeneity among  
148 studies, i.e. differences between tripartite networks not resulting simply from  
149 random sampling variance (50). In models with moderators, the Q-test tests for  
150 the presence of significant heterogeneity accounted for by the different levels of  
151 the moderator variables (QM), i.e., differences in correlation coefficients

152 between the different combinations of interaction outcome and intimacy. Finally,  
153 we estimated  $R^2$  to quantify the proportion of heterogeneity accounted for by  
154 these moderators. All meta-analysis procedures were conducted using the R  
155 package *metafor* v2.1-0 (51).

**Table S1 – Data sets description.** Location and geographic coordinates, network levels of interacting species, total number of species, number of species at the intermediate level (intermediate species), number of common species at the interface of the bipartite subnetworks (interface species), number of links, and size of each bipartite subnetwork of the tripartite networks used in the meta-analysis.

| Data set       | Location                        | Latitude/Longitude | Network levels                  | Total species | Intermediate species | Interface species | Links | Subnetwork size | References           |
|----------------|---------------------------------|--------------------|---------------------------------|---------------|----------------------|-------------------|-------|-----------------|----------------------|
| 01 AZORES      | Azores, Portugal                | 37.794/-25.191     | Parasite-Seed disperser-Plant   | 63            | 9                    | 7                 | 87    | 9x13-7x41       | (53, Heleno unpubl)  |
| 02 AZORES      | Azores, Portugal                | 37.794/-25.191     | Herbivore-Plant-Seed disperser  | 94            | 53                   | 21                | 165   | 31x36-41x7      | (53)                 |
| 03 AZORES      | Azores, Portugal                | 37.794/-25.191     | Plant-Herbivore-Parasitoid      | 79            | 37                   | 13                | 110   | 31x36-13x12     | (54)                 |
| 04 GALAPAGOS   | Galapagos, Ecuador              | -0.738/-89.882     | Seed disperser-Plant-Pollinator | 390           | 163                  | 37                | 1414  | 84x21-110x212   | (55, 56)             |
| 05 DORSET      | Dorset, UK                      | 50.823/-1.830      | Plant-Herbivore-Parasitoid      | 51            | 25                   | 11                | 87    | 25x11-11x15     | (57)                 |
| 06 NORWOOD     | Bristol, UK                     | 51.313/-2.321      | Plant-Herbivore-Parasitoid      | 42            | 19                   | 17                | 91    | 19x6-16x16      | (35, 58)             |
| 07 NORWOOD     | Bristol, UK                     | 51.313/-2.321      | Herbivore-Plant-Pollinator      | 329           | 77                   | 17                | 540   | 30x28-47x241    | (35)                 |
| 08 NORWOOD     | Bristol, UK                     | 51.313/-2.321      | Plant-Herbivore-Parasitoid      | 69            | 28                   | 9                 | 60    | 28x30-9x11      | (35)                 |
| 09 BORNEO      | Danum Valley, Borneo            | 4.967/117.800      | Plant defender-Herbivore-Plant  | 89            | 13                   | 12                | 180   | 13x43-13x32     | (59)                 |
| 10 COIMBRA     | Coimbra, Portugal               | 40.217/-8.450      | Parasite-Seed disperser-Plant   | 60            | 39                   | 8                 | 158   | 18x6-15x29      | (62, da Silva unpub) |
| 11 BEIRA       | Beira Litoral, Portugal         | 40.221/-8.890      | Plant-Galler-Parasitoid         | 93            | 31                   | 18                | 56    | 31x22-18x40     | (61)                 |
| 12 PURBECK     | Isle of Purbeck, UK             | 50.616/-2.043      | Parasitoid-Pollinator-Plant     | 25            | 9                    | 9                 | 80    | 9x12-9x4        | (16)                 |
| 13 HAWAII      | Hawaii, USA                     | 23.417/-159.617    | Plant-Herbivore-Parasitoid      | 68            | 29                   | 12                | 94    | 28x32-13x7      | (62)                 |
| 14 BRISTOL     | Bristol, UK                     | 51.479/-1.984      | Plant-Herbivore-Parasitoid      | 690           | 359                  | 155               | 1312  | 357x139-157x192 | (63)                 |
| 15 POLAND      | Białowieza, Poland              | 52.824/24.007      | Seed disperser-Plant-Pollinator | 357           | 15                   | 15                | 1220  | 15x34-15x308    | (64)                 |
| 16 GALAPAGOS   | Galapagos, Ecuador              | -0.738/-89.882     | Parasite-Seed disperser-Plant   | 114           | 36                   | 14                | 241   | 15x13-16x84     | (56, Heleno unpub)   |
| 17 MOZAMBIQUE  | Gorongosa, Mozambique           | -18.943/34.373     | Mycorrhiza-Plant-Seed disperser | 107           | 19                   | 10                | 202   | 16x69-16x16     | (20)                 |
| 18 NEW ZEALAND | Nelson-Marlborough, New Zealand | -41.484/173.006    | Plant-Herbivore-Parasitoid      | 204           | 90                   | 42                | 502   | 68x76-42x61     | (65, 66)             |

**Table S2 – Pearson’s *r* correlation coefficients for each tripartite network.** Pearson’s *r* correlation coefficients, with the 95% confidence interval in brackets for each tripartite network included in the meta-analysis of unstandardized and standardized species strength for species participating in both ecological functions. The type of interaction of each subnetwork were characterized in terms of their interaction outcome (antagonistic vs. mutualistic) and level of intimacy (permanent vs. temporary).

| Pearson’s <i>r</i> correlation coefficient (95% CI) |                           |                     |                                   |                                              |
|-----------------------------------------------------|---------------------------|---------------------|-----------------------------------|----------------------------------------------|
| Data set                                            | Interaction Outcomes      | Level of Intimacy   | Species strength (unstandardized) | Species strength (standardized by abundance) |
| 01 AZORES                                           | Antagonistic-Mutualistic  | Permanent-Temporary | 0.50 (-0.41, 0.91)                | 0.49 (-0.42, 0.91)                           |
| 02 AZORES                                           | Antagonistic-Mutualistic  | Permanent-Temporary | -0.02 (-0.45, 0.42)               | -0.26 (-0.62, 0.20)                          |
| 03 AZORES                                           | Antagonistic-Antagonistic | Permanent-Permanent | 0.89 (0.66, 0.97)                 | 0.69 (0.22, 0.90)                            |
| 04 GALAPAGOS                                        | Mutualistic-Mutualistic   | Temporary-Temporary | -0.01 (-0.33, 0.32)               | -0.15 (-0.45, 0.19)                          |
| 05 DORSET                                           | Antagonistic-Antagonistic | Permanent-Permanent | -0.01 (-0.61, 0.59)               | -0.03 (-0.62, 0.58)                          |
| 06 NORWOOD                                          | Antagonistic-Antagonistic | Permanent-Permanent | 0.93 (-0.81, 0.97)                | 0.51 (-0.04, 0.80)                           |
| 07 NORWOOD                                          | Antagonistic-Mutualistic  | Permanent-Temporary | 0.44 (-0.05, 0.76)                | 0.20 (-0.10, 0.62)                           |
| 08 NORWOOD                                          | Antagonistic-Antagonistic | Permanent-Permanent | 0.48 (-0.27, 0.87)                | 0.46 (-0.29, 0.86)                           |
| 09 BORNEO                                           | Antagonistic-Mutualistic  | Permanent-Permanent | 0.30 (-0.33, 0.75)                | 0.24 (-0.38, 0.72)                           |
| 10 COIMBRA                                          | Antagonistic-Mutualistic  | Permanent-Temporary | -0.01 (-0.71, 0.70)               | -0.11 (-0.75, 0.65)                          |
| 11 BEIRA                                            | Antagonistic-Antagonistic | Permanent-Permanent | -0.14 (-0.57, 0.35)               | -0.34 (-0.70, 0.15)                          |
| 12 PURBECK                                          | Antagonistic-Mutualistic  | Permanent-Temporary | 0.85 (0.42, 0.97)                 | 0.83 (0.38, 0.96)                            |
| 13 HAWAII                                           | Antagonistic-Antagonistic | Permanent-Permanent | 0.15 (-0.47, 0.66)                | -0.24 (-0.72, 0.39)                          |
| 14 BRISTOL                                          | Antagonistic-Antagonistic | Permanent-Permanent | 0.14 (-0.02, 0.29)                | 0.17 (0.01, 0.32)                            |
| 15 POLAND                                           | Mutualistic-Mutualistic   | Temporary-Temporary | 0.71 (0.32, 0.90)                 | 0.66 (-0.21, 0.87)                           |
| 16 GALAPAGOS                                        | Antagonistic-Mutualistic  | Permanent-Temporary | 0.63 (-0.15, 0.87)                | 0.58 (0.08, 0.85)                            |
| 17 MOZAMBIQUE                                       | Mutualistic-Mutualistic   | Permanent-Temporary | -0.39 (-0.82, 0.32)               | -0.22 (-0.75, 0.48)                          |
| 18 NEW ZEALAND                                      | Antagonistic-Antagonistic | Permanent-Permanent | 0.58 (0.34, 0.75)                 | 0.46 (0.18, 0.67)                            |

**Table S3 - Meta-analysis full results.**  $r$  - Pearson's correlation coefficient [95% confidence interval] of each model;  $QE$  - heterogeneity across studies;  $I^2$  - % heterogeneity among correlation coefficients not due to random sampling variance;  $QM$  - heterogeneity accounted by moderators;  $df$  - degrees of freedom of the model;  $p$  - significance of the Q-test for heterogeneity;  $R^2$  - % heterogeneity accounted for by moderators (each with three levels). Correlations in which the 95% CI did not overlap zero are given in bold.

|                                 |                             | Species strength<br>(unstandardized)                                                                   | Species strength<br>(standardized by abundance)                                                        |
|---------------------------------|-----------------------------|--------------------------------------------------------------------------------------------------------|--------------------------------------------------------------------------------------------------------|
|                                 |                             | <b><math>r = 0.42</math> [0.18, 0.61]</b>                                                              | <b><math>r = 0.24</math> [0.05, 0.42]</b>                                                              |
| Random model<br>(no moderators) |                             | $QE = 72.403$ , $df = 17$<br>$p < 0.001$<br>$I^2 = 80.2\%$                                             | $QE = 39.524$ , $df = 17$<br>$p = 0.002$<br>$I^2 = 63.3\%$                                             |
|                                 |                             | $QE = 70.149$ , $df = 15$<br>$p < 0.001$<br>$I^2 = 80.0\%$                                             | $QE = 38.092$ , $df = 15$<br>$p < 0.001$<br>$I^2 = 65.6\%$                                             |
| Moderator: Interaction Outcome  | Mixed-Effect Model          | $QM = 0.892$ , $df = 2$<br>$p = 0.640$<br>$R^2 = 0.0\%$                                                | $QM = 0.327$ , $df = 2$<br>$p = 0.849$<br>$R^2 = 0.0\%$                                                |
|                                 | Antagonistic + Antagonistic | <b><math>r = 0.50</math> [0.08, 0.76]</b><br>$QE = 50.648$ , $df = 7$<br>$p < 0.001$<br>$I^2 = 88.8\%$ | $r = 0.24$ [-0.03, 0.48]<br>$QE = 16.750$ , $df = 7$<br>$p = 0.019$<br>$I^2 = 65.2\%$                  |
|                                 | Antagonistic + Mutualistic  | <b><math>r = 0.41</math> [0.12, 0.64]</b><br>$QE = 9.788$ , $df = 6$<br>$p = 0.134$<br>$I^2 = 38.9\%$  | $r = 0.30$ [-0.05, 0.59]<br>$QE = 13.034$ , $df = 6$<br>$p = 0.043$<br>$I^2 = 53.7\%$                  |
|                                 | Mutualistic + Mutualistic   | $r = 0.17$ [-0.50, 0.71]<br>$QE = 9.713$ , $df = 2$<br>$p = 0.008$<br>$I^2 = 81.9\%$                   | $r = 0.14$ [-0.46, 0.64]<br>$QE = 8.309$ , $df = 2$<br>$p = 0.016$<br>$I^2 = 76.0\%$                   |
|                                 | Mixed-Effect Model          | $QE = 71.890$ , $df = 15$<br>$p < 0.001$<br>$I^2 = 80.8\%$                                             | $QE = 38.862$ , $df = 15$<br>$p < 0.001$<br>$I^2 = 66.5\%$                                             |
| Moderator: Interaction Intimacy | Mixed-Effect Model          | $QM = 0.287$ , $df = 2$<br>$p = 0.867$<br>$R^2 = 0.0\%$                                                | $QM = 0.001$ , $df = 2$<br>$p = 0.999$<br>$R^2 = 0.0\%$                                                |
|                                 | Permanent + Permanent       | <b><math>r = 0.45</math> [0.11, 0.73]</b><br>$QE = 50.655$ , $df = 8$<br>$p < 0.001$<br>$I^2 = 86.7\%$ | <b><math>r = 0.24</math> [0.00, 0.45]</b><br>$QE = 16.755$ , $df = 8$<br>$p = 0.033$<br>$I^2 = 58.1\%$ |
|                                 | Permanent + Temporary       | $r = 0.34$ [-0.04, 0.63]<br>$QE = 14.015$ , $df = 6$<br>$p = 0.030$<br>$I^2 = 58.5\%$                  | $r = 0.25$ [-0.14, 0.57]<br>$QE = 14.4219$ , $df = 6$<br>$p = 0.025$<br>$I^2 = 58.6\%$                 |
|                                 | Temporary + Temporary       | $r = 0.39$ [-0.44, 0.86]<br>$QE = 7.221$ , $df = 1$<br>$p = 0.007$<br>$I^2 = 86.2\%$                   | $r = 0.28$ [-0.55, 0.83]<br>$QE = 7.689$ , $df = 1$<br>$p = 0.006$<br>$I^2 = 87.0\%$                   |
